# Supplementary material for: NDUFA4 Mutations Underlie Dysfunction of a Cytochrome c Oxidase Subunit Linked to Human Neurological Disease
Source: PubMed Central journal article supplement (PMC3701321; doi:10.1016/j.celrep.2013.05.005), 2013-06-27
Supplement: mmc4.pdf [file mmc4.pdf]

**Table S4. Oligonucleotides for *NDUFA4* PCR Amplification and Sequence Analysis in gDNA, Related to Figure 2**

|               | <b>Forward Primers (5' to 3')</b> | <b>Reverse Primers (3' to 5')</b> |
|---------------|-----------------------------------|-----------------------------------|
| <b>Exon 1</b> | GACCAGGTCAGGACGAACAT              | GTCTGACGGACGGTAAGTGG              |
| <b>Exon 2</b> | ATCTCTCGTTGGCCAGTGTT              | TTACATGTGCCGAGAACCA               |
| <b>Exon 3</b> | AAAGGTTTTGTGAAAGCCAGA             | TCTCTGGGGATAAAGGCTGAA             |
| <b>Exon 4</b> | CATTGAAGGCTGGAATTTTAGG            | TCCAGTTCAGTTGTTATGTATGC           |
